# Supplementary material for: Serum Growth Differentiation Factor-15/Albumin Ratio as a 2-Year Survival Marker of End-Stage Renal Disease Patients Initiating Maintenance Hemodialysis
Source: Diagnostics (Basel). 2022 Jan 20;12(2):257. doi: 10.3390/diagnostics12020257 (PMC8870838; doi:10.3390/diagnostics12020257)
Supplement: Supplementary file 1 [file diagnostics-12-00257-s001.zip › diagnostics-1542077-supplementary.pdf]

## Supplementary Data

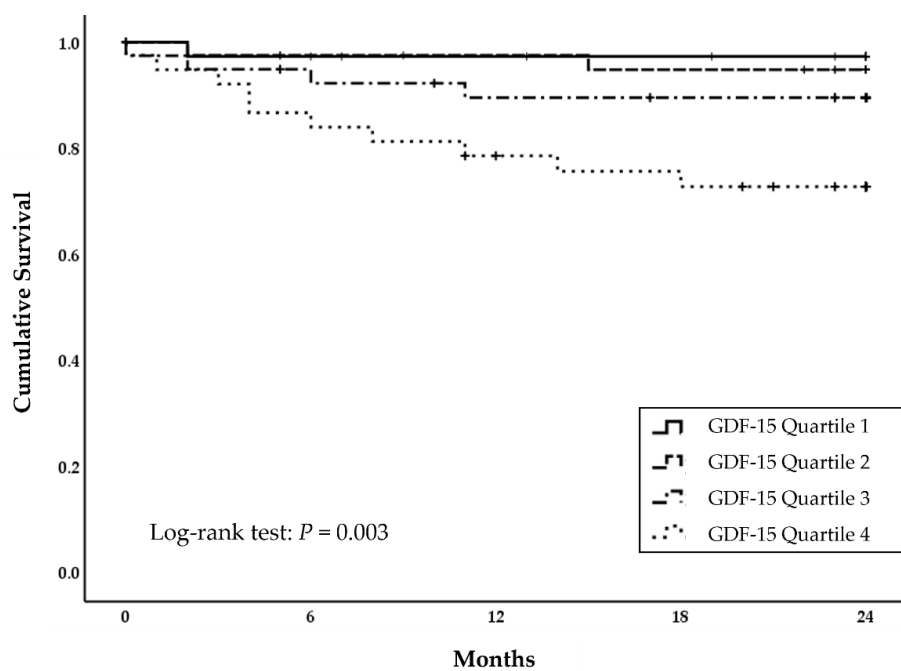

(A)

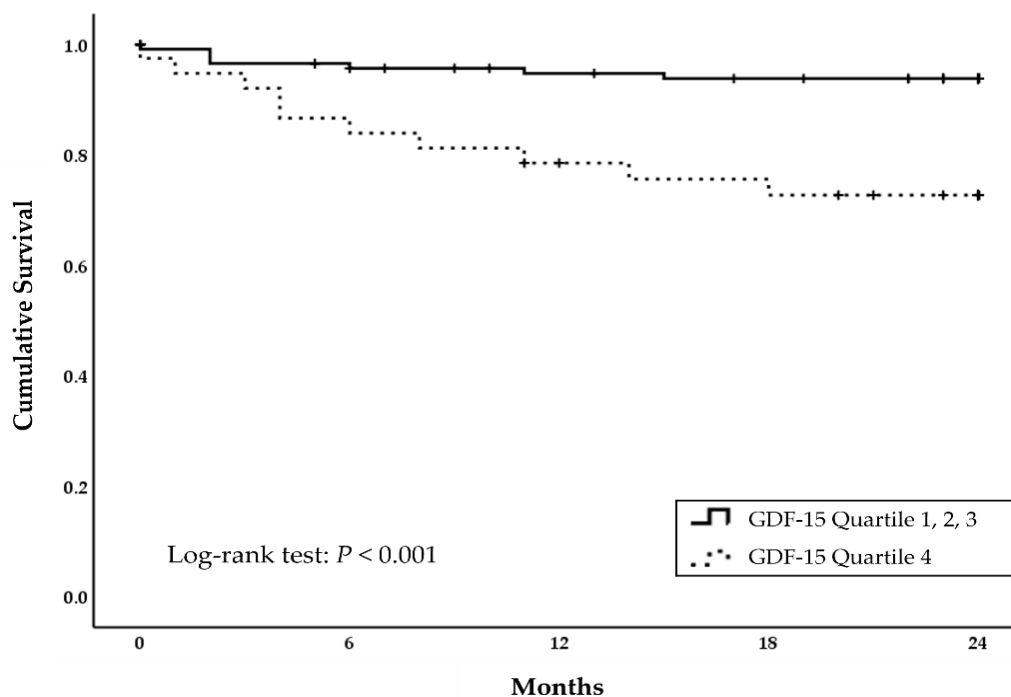

(B)

**Figure S1.** Kaplan-Meier analysis of all-cause mortality in ESRD patients starting maintenance hemodialysis according to: (A) each serum GDF-15 quartile and (B) highest GDF-15 quartile.

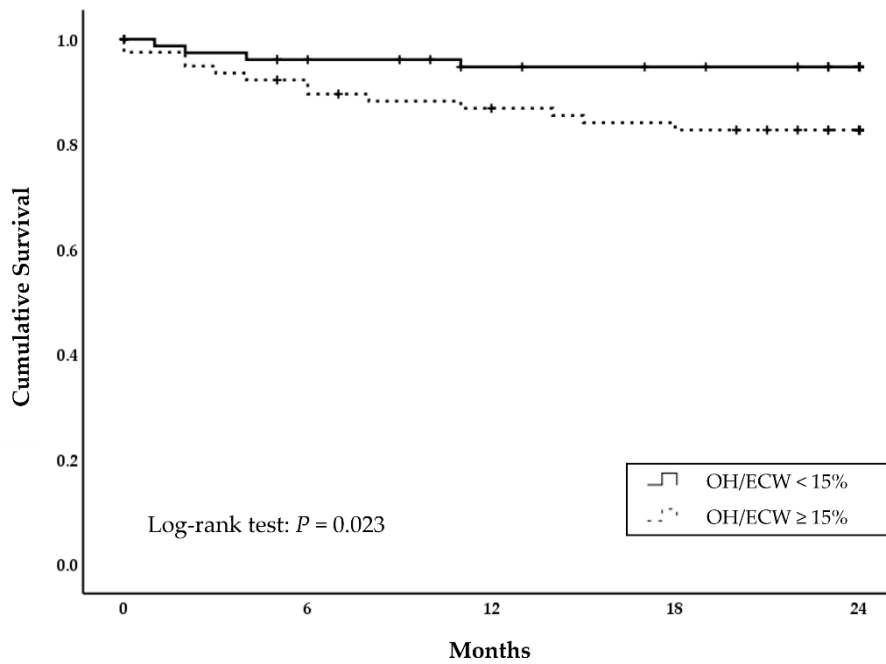

**Figure S2.** Kaplan-Meier analysis of all-cause mortality in ESRD patients starting maintenance hemodialysis according to OH/ECW, the normalized hydration state (OH/ECW>15% was considered overhydrated).

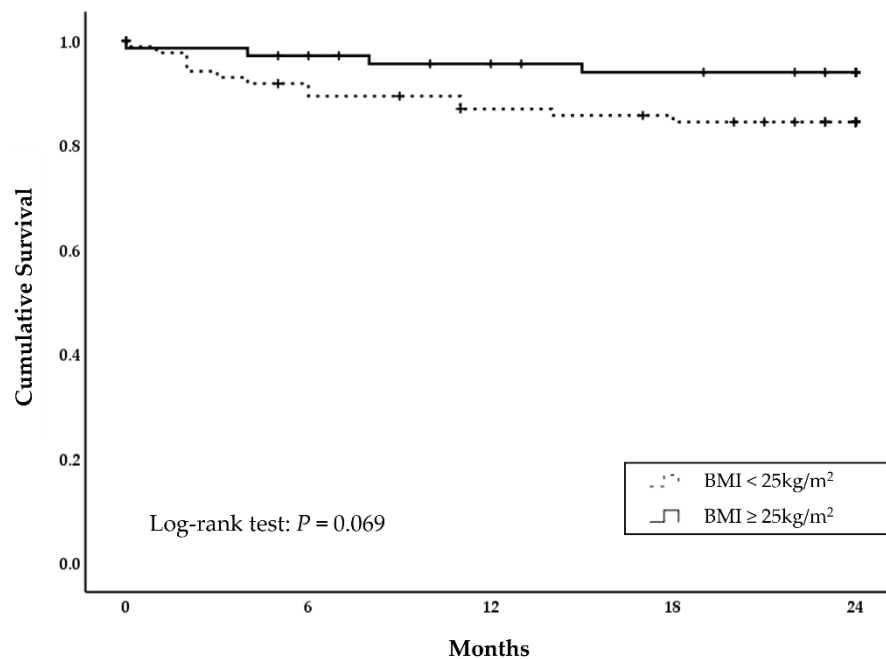

**Figure S3.** Kaplan-Meier analysis of all-cause mortality in ESRD patients starting maintenance hemodialysis according to BMI.

**Table S1.** Association of serum GDF-15 and all-cause mortality by Cox proportional hazard analysis.

| Variables      | GDF-15 Quartile 1, 2, 3 |         | GDF-15/Albumin Quartile 4 (>75 percentile) |         |
|----------------|-------------------------|---------|--------------------------------------------|---------|
|                | HR (95% CI)             | P value | HR (95% CI)                                | P value |
| <b>Model 1</b> | 1                       | N/A     | 4.821 (1.834, 12.673)                      | <0.001  |
| <b>Model 2</b> | 1                       | N/A     | 2.916 (1.022, 8.321)                       | 0.045   |
| <b>Model 3</b> | 1                       | N/A     | 1.741 (0.614, 4.940)                       | 0.297   |

Model 1: Unadjusted; Model 2: Adjusted for age, diabetes mellitus, OH/ECW, Model 3: Adjusted for age, diabetes mellitus, OH/ECW, albumin; N/A: not applicable.
